# Supplementary material
Source: Springer Nature journal article supplement (https://www.springermedizin.de/resource/supplementary/12888_2012_1200_MOESM1_ESM.pdf/9480202)

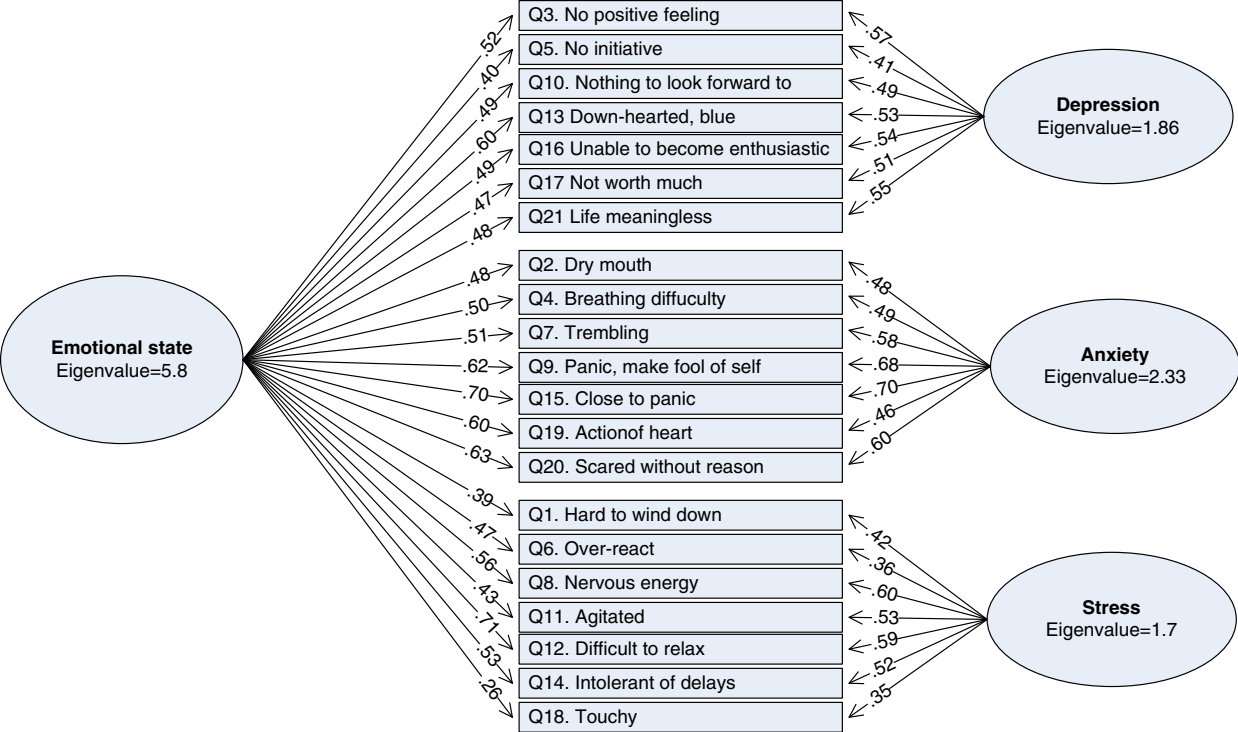

Exploratory factor analysis for all items

Exploratory factor analysis for each sub-scale

Supplement: MOESM1 [file 9480202]
